# Supplementary material for: Digital Detection of Multiple Minority Mutants and Expression Levels of Multiple Colorectal Cancer-Related Genes Using Digital-PCR Coupled with Bead-Array
Source: PLOS journal article supplement (doi:10.1371/journal.pone.0123420), 2015-04-16
Supplement: S1 (10.1371/journal.pone.0123420.s001) [file journal.pone.0123420.s001]

Table S1. Details and detection results of 6 patients by using stool as starting material.

| Patient No. | Age | Dukes' stage | Mutation detection | CRC-related gene expression analysis |
|-------------|-----|--------------|--------------------|--------------------------------------|
| 1           | 48  | D            | positive           | ↑                                    |
| 2           | 60  | B            | negative           | ↑                                    |
| 3           | 54  | B            | positive           | ↑                                    |
| 4           | 45  | B            | negative           | ↓                                    |
| 5           | 68  | C            | positive           | ↑                                    |
| 6           | 58  | A            | negative           | ↑                                    |

“↑” represents “the patient with a high expression of CRC-related genes”.

“↓” represents “the patient with a low expression of CRC-related genes”.
